# Supplementary material
Source: PubMed Central journal article supplement (PMC3182844)
Supplement: zpee821-S1.pdf [file zpee821-S1.pdf]

## Supplemental Information

**SUPPLEMENTAL TABLE 6** Crude Associations With Food Sensitization

|                                                      | OR (95% CI) or $\beta$ (95% CI)      | <i>P</i> |
|------------------------------------------------------|--------------------------------------|----------|
| Associations with food sensitization                 |                                      |          |
| Preterm birth                                        | 0.81 (0.61–1.06)                     | .13      |
| Prenatal smoke exposure                              | 0.74 (0.48–1.14)                     | .18      |
| Maternal postnatal smoking                           | 0.78 (0.5–1.10)                      | .16      |
| Maternal atopy                                       | 1.17 (0.90–1.51)                     | .23      |
| Cesarean delivery                                    | 1.10 (0.82–1.39)                     | .62      |
| Firstborn child                                      | 1.29 (1.01–1.66)                     | .04      |
| Male                                                 | 1.57 (1.22–2.01)                     | <.0001   |
| Exclusive breastfeeding                              | 1.42 (0.85–2.39)                     | .18      |
| Mother's highest level of education                  |                                      |          |
| Some college                                         | 1.00                                 |          |
| High school                                          | 1.07 (0.80–1.45)                     | .63      |
| Less than high school                                | 1.11 (0.82–1.52)                     | .50      |
| Annual household income                              |                                      |          |
| At least \$30 000                                    | 1.00                                 |          |
| Less than \$30 000                                   | 1.03 (0.78–1.38)                     | .82      |
| Unknown                                              | 1.34 (0.94–1.89)                     | .10      |
| Self-identified race                                 |                                      |          |
| White                                                | 1.00                                 |          |
| Black                                                | 2.19 (1.19–4.03)                     | .01      |
| Hispanic                                             | 1.87 (0.98–3.56)                     | .06      |
| Other                                                | 2.06 (1.02–4.15)                     | .04      |
| Mother's age                                         | 0.002 (–0.003 to 0.006) <sup>a</sup> | .45      |
| Child's age                                          | 0.004 (–0.009 to 0.017) <sup>a</sup> | .54      |
| Crude associations with African ancestry             |                                      |          |
| Food sensitization across sample (all races)         | 1.07 (1.02–1.11)                     | .003     |
| No. of food sensitizations across sample (all races) | 0.05 (0.03–0.07) <sup>a</sup>        | <.0001   |

All ancestry analyses included estimates of individual global ancestry with variables for African and Asian ancestry, assuming 3 ancestral populations.

<sup>a</sup> Values shown are  $\beta$  (95% CI).
